# Supplementary material for: Candidate gene prioritization based on spatially mapped gene expression: an application to XLMR
Source: PubMed Central journal article supplement — Bioinformatics. 2010 Sep 4;26(18):i618–24. doi: 10.1093/bioinformatics/btq396 (PMC2935433; doi:10.1093/bioinformatics/btq396), 2010-09-04

Supplementary Materials to:  
**Candidate gene prioritization based on spatially mapped gene expression:  
an application to XLMR**

Rosario M. Piro, Ivan Molineris, Ugo Ala, Paolo Provero, Ferdinando Di Cunto  
Molecular Biotechnology Center and Department of Genetics, Biology and Biochemistry  
University of Torino, Italy – corresponding author: rosario.piro@unito.it

## A. Supplementary Methods

### Translation of Ensembl gene IDs to Entrez gene IDs

Ensembl gene IDs reported for the genes on chromosome X resequenced by Tarpey et al. [1] have been mapped to Entrez gene IDs using Ensembl 55 [2].

### Mouse brain microarray expression data (GNF)

For comparison with microarray expression data, we used the GNF expression atlas of Su et al. [3], taking however only the samples from mouse brain tissues (8x2 data points for 8 tissues with 2 replicates). Only probesets with unique mappings to Entrez gene IDs (original GNF annotation) were used and the expression profiles of multiple probesets for the same gene were averaged, yielding expression profiles for a total of 12,676 Entrez mouse genes.

## B. Supplementary Tables

**Table S1:** Results of the leave-one-out tests for human phenotypes with (at least partly) “known molecular basis” (OMIM class: #) using ABA expression data, and for mouse phenotypes using the GNF brain microarray data.  $N$  represents the size of the artificial loci having at most  $2N+1$  genes. The average numbers of effective candidates with expression data and the numbers of evaluated  $g-p$  pairs are shown. The observed and expected numbers of  $g-p$  pairs, for which the true phenotype-causing gene  $g$  ranks first, among the top ten and within the best 10% of the prioritized list, is reported along with the corresponding p-values (one-tailed Fisher exact test). Significant p-values are highlighted ( $* < 0.05$ ;  $** < 0.01$ ;  $*** < 0.001$ ).

| organism, phenotypes             | $N$ | candidates (average) | $g-p$ pairs | ranked first |      |            | ranked 1st–10th |      |             | ranked $\leq 10\%$ |      |             |
|----------------------------------|-----|----------------------|-------------|--------------|------|------------|-----------------|------|-------------|--------------------|------|-------------|
|                                  |     |                      |             | obs.         | exp. | p-value    | obs.            | exp. | p-value     | obs.               | exp. | p-value     |
| human, molecular basis known (#) | 50  | 73.8                 | 797         | 16           | 11   | 7.95e-02   | 150             | 108  | 1.75e-05*** | 127                | 80   | 1.04e-07*** |
| human, molecular basis known (#) | 100 | 137.7                | 844         | 13           | 6    | 9.83e-03** | 106             | 61   | 3.36e-08*** | 133                | 84   | 1.13e-07*** |
| human, molecular basis known (#) | 200 | 256.6                | 847         | 6            | 3    | 1.16e-01   | 63              | 33   | 1.21e-06*** | 140                | 85   | 2.82e-09*** |
| mouse [microarray: GNF-brain]    | 50  | 52.9                 | 61          | 2            | 1    | 3.21e-01   | 11              | 12   | 6.22e-01    | 10                 | 6    | 8.50e-02    |
| mouse [microarray: GNF-brain]    | 100 | 80.9                 | 292         | 6            | 4    | 1.55e-01   | 48              | 36   | 2.38e-02*   | 41                 | 29   | 1.64e-02*   |
| mouse [microarray: GNF-brain]    | 200 | 143.8                | 311         | 4            | 2    | 1.72e-01   | 32              | 22   | 1.75e-02*   | 39                 | 31   | 8.33e-02    |

**Table S2:** Prioritization (*evaluation*) of the chromosome X genes resequenced by Tarpey et al. [1] for XLMR, according to the overall score  $s_c$  (see Eq. 1 in the paper). XLMR was considered as phenotype with *unknown* molecular basis; known XLMR genes were considered as candidates and only genes known to be involved in similar phenotypes were taken as reference genes. Only the best 10% of the prioritized list is shown. Gene names, IDs (except Entrez), associations to disorders and mutation scores are as reported by Tarpey et al. [1]. Mutation scores reflect the conservation scores at missense positions [1] and are summed over the single missense mutations found for each gene.

| Rank | Gene    | Ensembl ID      | Refseq ID    | Entrez ID | Disorder | Mutation score | Score $s_c$ |
|------|---------|-----------------|--------------|-----------|----------|----------------|-------------|
| 1    | BRWD3   | ENSG00000165288 | NM_153252    | 254065    | XLMR     | 2.86           | 7.16E-078   |
| 2    | IRAK1   | ENSG00000184216 | NM_001569    | 3654      | -        | 1.94           | 1.84E-071   |
| 3    | SYP     | ENSG00000102003 | NM_003179    | 6855      | XLMR     | -              | 8.97E-069   |
| 4    | BIRC4   | ENSG00000101966 | -            | 331       | other    | 37.04          | 4.28E-068   |
| 5    | MAGED1  | ENSG00000179222 | NM_001005332 | 9500      | -        | 5.14           | 5.63E-068   |
| 6    | MORF4L2 | ENSG00000123562 | NM_012286    | 9643      | -        | -              | 3.37E-066   |
| 7    | ZNF280C | ENSG00000056277 | NM_017666    | 55609     | -        | -              | 5.07E-065   |

**Table S2** (continued)

|    |         |                 |              |        |       |       |           |
|----|---------|-----------------|--------------|--------|-------|-------|-----------|
| 8  | SYN1    | ENSG00000008056 | NM_006950    | 6853   | XLMR  | -     | 1.15E-064 |
| 9  | CXorf6  | ENSG00000013619 | -            | 10046  | other | 12.00 | 1.19E-064 |
| 10 | ATP6AP2 | ENSG00000182220 | NM_005765    | 10159  | XLMR  | -     | 2.70E-064 |
| 11 | HCFC1   | ENSG00000172534 | NM_005334    | 3054   | -     | 27.82 | 1.65E-061 |
| 12 | PJA1    | ENSG00000181191 | NM_022368    | 64219  | -     | 2.44  | 1.82E-061 |
| 13 | NGFRAP1 | ENSG00000166681 | NM_206917    | 27018  | -     | -     | 1.91E-061 |
| 14 | FAM50A  | ENSG00000071859 | NM_004699    | 9130   | -     | 11.62 | 5.63E-061 |
| 15 | HUWE1   | ENSG00000086758 | NM_031407    | 10075  | XLMR  | 46.75 | 1.62E-060 |
| 16 | GRIA3   | ENSG00000125675 | NM_007325    | 2892   | XLMR  | 13.00 | 1.14E-059 |
| 17 | PIGA    | ENSG00000165195 | NM_002641    | 5277   | other | -     | 3.24E-059 |
| 18 | OGT     | ENSG00000147162 | NM_181672    | 8473   | -     | 15.90 | 4.15E-059 |
| 19 | GNL3L   | ENSG00000130119 | NM_019067    | 54552  | -     | 22.49 | 1.68E-058 |
| 20 | WDR40C  | ENSG00000198354 | NM_001013628 | 340578 | -     | 0.22  | 3.35E-058 |
| 21 | UTX     | ENSG00000147050 | NM_021140    | 7403   | -     | -     | 2.18E-057 |
| 22 | RNF113A | ENSG00000125352 | NM_006978    | 7737   | -     | 6.49  | 7.01E-057 |
| 23 | FLNA    | ENSG00000196924 | NM_001110556 | 2316   | XLMR  | 14.57 | 1.01E-056 |
| 24 | PCTK1   | ENSG00000102225 | NM_033018    | 5127   | -     | -     | 1.59E-056 |
| 25 | MAGEE1  | ENSG00000198934 | NM_020932    | 57692  | -     | 2.04  | 2.87E-056 |
| 26 | PGRMC1  | ENSG00000101856 | NM_006667    | 10857  | -     | 9.70  | 4.20E-056 |
| 27 | ARHGEF9 | ENSG00000131089 | NM_015185    | 23229  | XLMR  | -     | 5.65E-055 |
| 28 | ATP2B3  | ENSG00000067842 | NM_021949    | 492    | -     | 4.49  | 1.48E-054 |
| 29 | PGK1    | ENSG00000102144 | NM_000291    | 5230   | XLMR  | 15.67 | 4.56E-054 |
| 30 | DRP2    | ENSG00000102385 | NM_001939    | 1821   | -     | 41.79 | 4.74E-054 |
| 31 | ARMCX2  | ENSG00000184867 | NM_177949    | 9823   | -     | -     | 5.77E-054 |
| 32 | TAZ     | ENSG00000102125 | NM_000116    | 6901   | other | -     | 1.80E-053 |
| 33 | OPHN1   | ENSG00000079482 | NM_002547    | 4983   | XLMR  | 15.77 | 1.24E-052 |
| 34 | GRIPAP1 | ENSG00000068400 | NM_020137    | 56850  | -     | 8.17  | 2.38E-052 |
| 35 | PLP2    | ENSG00000102007 | NM_002668    | 5355   | -     | -     | 8.21E-052 |
| 36 | REPS2   | ENSG00000169891 | NM_001080975 | 9185   | -     | -     | 1.31E-051 |
| 37 | RPS4X   | ENSG00000198034 | NM_001007    | 6191   | -     | -     | 1.74E-051 |
| 38 | HPRT1   | ENSG00000165704 | NM_000194    | 3251   | XLMR  | -     | 2.32E-051 |
| 39 | ARMCX1  | ENSG00000126947 | NM_016608    | 51309  | -     | -     | 3.56E-051 |
| 40 | NLGN3   | ENSG00000196338 | NM_018977    | 54413  | XLMR  | -     | 4.67E-051 |
| 41 | SAT1    | ENSG00000130066 | NM_002970    | 6303   | other | -     | 5.22E-051 |
| 42 | CSTF2   | ENSG00000101811 | NM_001325    | 1478   | -     | 7.39  | 1.26E-050 |
| 43 | USP9X   | ENSG00000124486 | NM_001039590 | 8239   | -     | -     | 1.31E-050 |
| 44 | SLITRK2 | ENSG00000185985 | NM_032539    | 84631  | -     | 9.62  | 2.16E-050 |
| 45 | GPM6B   | ENSG00000046653 | NM_001001995 | 2824   | -     | -     | 1.41E-049 |
| 46 | GJB1    | ENSG00000169562 | NM_001097642 | 2705   | other | -     | 3.06E-049 |
| 47 | SLC9A6  | ENSG00000198689 | NM_001042537 | 10479  | XLMR  | 8.58  | 1.92E-048 |

**Table S3:** Prioritization (*prediction*) of the chromosome X genes resequenced by Tarpey et al. [1] for XLMR, according to the overall score  $s_c$  (see Eq. 1 in the paper). XLMR was considered as phenotype with *known* molecular basis; only genes not known to be involved in XLMR were considered as candidates and known XLMR gene were taken as reference genes; the concept of phenotype similarity was not applied. Only the best 10% of the prioritized list is shown. Gene names, IDs (except Entrez), associations to disorders and mutation scores are as reported by Tarpey et al. [1]. Mutation scores reflect the conservation scores at missense positions [1] and are summed over the single missense mutations found for each gene.

| Rank | Gene    | Ensembl ID      | Refseq ID    | Entrez ID | Disorder | Mutation score | Score $s_c$ |
|------|---------|-----------------|--------------|-----------|----------|----------------|-------------|
| 1    | MORF4L2 | ENSG00000123562 | NM_012286    | 9643      | -        | -              | 5.09E-099   |
| 2    | PJA1    | ENSG00000181191 | NM_022368    | 64219     | -        | 2.44           | 7.70E-097   |
| 3    | ZNF280C | ENSG00000056277 | NM_017666    | 55609     | -        | -              | 1.91E-093   |
| 4    | MAGED1  | ENSG00000179222 | NM_001005332 | 9500      | -        | 5.14           | 1.55E-091   |
| 5    | MAGEE1  | ENSG00000198934 | NM_020932    | 57692     | -        | 2.04           | 1.60E-085   |
| 6    | BIRC4   | ENSG00000101966 | -            | 331       | other    | 37.04          | 1.02E-084   |
| 7    | GRIPAP1 | ENSG00000068400 | NM_020137    | 56850     | -        | 8.17           | 3.13E-082   |
| 8    | CXorf6  | ENSG00000013619 | -            | 10046     | other    | 12.00          | 3.75E-081   |
| 9    | GNL3L   | ENSG00000130119 | NM_019067    | 54552     | -        | 22.49          | 4.07E-081   |
| 10   | FAM50A  | ENSG00000071859 | NM_004699    | 9130      | -        | 11.62          | 7.72E-081   |
| 11   | PGRMC1  | ENSG00000101856 | NM_006667    | 10857     | -        | 9.70           | 8.65E-081   |
| 12   | GPM6B   | ENSG00000046653 | NM_001001995 | 2824      | -        | -              | 4.12E-079   |
| 13   | IRAK1   | ENSG00000184216 | NM_001569    | 3654      | -        | 1.94           | 8.19E-079   |
| 14   | HCFC1   | ENSG00000172534 | NM_005334    | 3054      | -        | 27.82          | 1.28E-078   |
| 15   | PIGA    | ENSG00000165195 | NM_002641    | 5277      | other    | -              | 1.65E-078   |
| 16   | RPS4X   | ENSG00000198034 | NM_001007    | 6191      | -        | -              | 4.97E-078   |
| 17   | REPS2   | ENSG00000169891 | NM_001080975 | 9185      | -        | -              | 2.81E-077   |
| 18   | ARMCX2  | ENSG00000184867 | NM_177949    | 9823      | -        | -              | 1.67E-075   |
| 19   | DRP2    | ENSG00000102385 | NM_001939    | 1821      | -        | 41.79          | 3.64E-074   |
| 20   | MED14   | ENSG00000180182 | NM_004229    | 9282      | -        | 9.54           | 1.41E-073   |
| 21   | ARMCX1  | ENSG00000126947 | NM_016608    | 51309     | -        | -              | 2.94E-073   |
| 22   | WDR40C  | ENSG00000198354 | NM_001013628 | 340578    | -        | 0.22           | 5.30E-073   |
| 23   | PCTK1   | ENSG00000102225 | NM_033018    | 5127      | -        | -              | 1.31E-072   |
| 24   | OGT     | ENSG00000147162 | NM_181672    | 8473      | -        | 15.90          | 1.02E-069   |
| 25   | WBP5    | ENSG00000185222 | NM_016303    | 51186     | -        | -              | 2.71E-069   |
| 26   | RNF113A | ENSG00000125352 | NM_006978    | 7737      | -        | 6.49           | 6.25E-069   |
| 27   | BEX1    | ENSG00000133169 | NM_018476    | 55859     | -        | -              | 7.64E-069   |
| 28   | PDZD11  | ENSG00000120509 | NM_016484    | 51248     | -        | -              | 1.55E-068   |
| 29   | GPRASP2 | ENSG00000158301 | NM_138437    | 114928    | -        | 4.00           | 1.70E-068   |
| 30   | SLITRK2 | ENSG00000185985 | NM_032539    | 84631     | -        | 9.62           | 3.49E-068   |
| 31   | USP9X   | ENSG00000124486 | NM_001039590 | 8239      | -        | -              | 1.32E-067   |
| 32   | CLCN4   | ENSG00000073464 | NM_001830    | 1183      | -        | 21.36          | 1.12E-064   |
| 33   | SAT1    | ENSG00000130066 | NM_002970    | 6303      | other    | -              | 1.19E-064   |
| 34   | TCEAL1  | ENSG00000172465 | NM_001006640 | 9338      | -        | -              | 1.66E-064   |
| 35   | TCEAL8  | ENSG00000180964 | NM_153333    | 90843     | -        | 5.22           | 2.47E-064   |
| 36   | TAZ     | ENSG00000102125 | NM_000116    | 6901      | other    | -              | 2.63E-064   |

**Table S3** (continued)

|    |        |                 |           |       |   |      |           |
|----|--------|-----------------|-----------|-------|---|------|-----------|
| 37 | BHLHB9 | ENSG00000198908 | NM_030639 | 80823 | - | -    | 3.56E-064 |
| 38 | CSTF2  | ENSG00000101811 | NM_001325 | 1478  | - | 7.39 | 1.40E-063 |
| 39 | UTX    | ENSG00000147050 | NM_021140 | 7403  | - | -    | 1.64E-063 |

**Table S4:** Area under ROC curve (AUC) for leave-one-out validations (see also Figure S1).  $N$  represents the size of the artificial loci having at most  $2N+1$  genes. AUCs are reported based on both the true disease gene's relative rank in the prioritized candidate list and its absolute rank in the list.

| organism,<br>phenotypes            | $N$ | AUC                    |                        |
|------------------------------------|-----|------------------------|------------------------|
|                                    |     | based on relative rank | based on absolute rank |
| mouse                              | 50  | 0.54889                | 0.55560                |
| mouse                              | 100 | 0.54659                | 0.55595                |
| mouse                              | 200 | 0.54774                | 0.56173                |
| human, molecular basis unknown (%) | 50  | 0.54944                | 0.55725                |
| human, molecular basis unknown (%) | 100 | 0.55541                | 0.56418                |
| human, molecular basis unknown (%) | 200 | 0.55747                | 0.56931                |
| human, molecular basis known (#)   | 50  | 0.55099                | 0.55891                |
| human, molecular basis known (#)   | 100 | 0.55694                | 0.56592                |
| human, molecular basis known (#)   | 200 | 0.55881                | 0.57072                |

## C. Supplementary Figures

**Figure S1 (see next page):** ROC curves for the leave-one-out validation. ROCs are shown based on both the true disease gene's relative rank in the prioritized candidate list and its absolute rank in the list. Only ROC curves for locus sizes of  $N=200$  (max. 401 genes) are shown; as also suggested by the AUCs (see Table S4), the ROC curves for  $N=50$  and  $N=100$  are nearly identical.

## D. Supplementary References

- [1] Tarpey, P.S., *et al.* (2009) A systematic, large-scale resequencing screen of X-chromosome coding exons in mental retardation, *Nature Genetics*, **41**(5), 535-543.
- [2] Hubbard, T.J.P., *et al.* (2009) Ensembl 2009, *Nucleic Acids Research*, **37**, D690-D697.
- [3] Su, A.I., *et al.* (2004) A gene atlas of the mouse and human protein-encoding transcriptomes, *Proc Natl Acad Sci U S A*. **101**(16): 6062–6067.

**Figure S1 (see previous page for caption)**

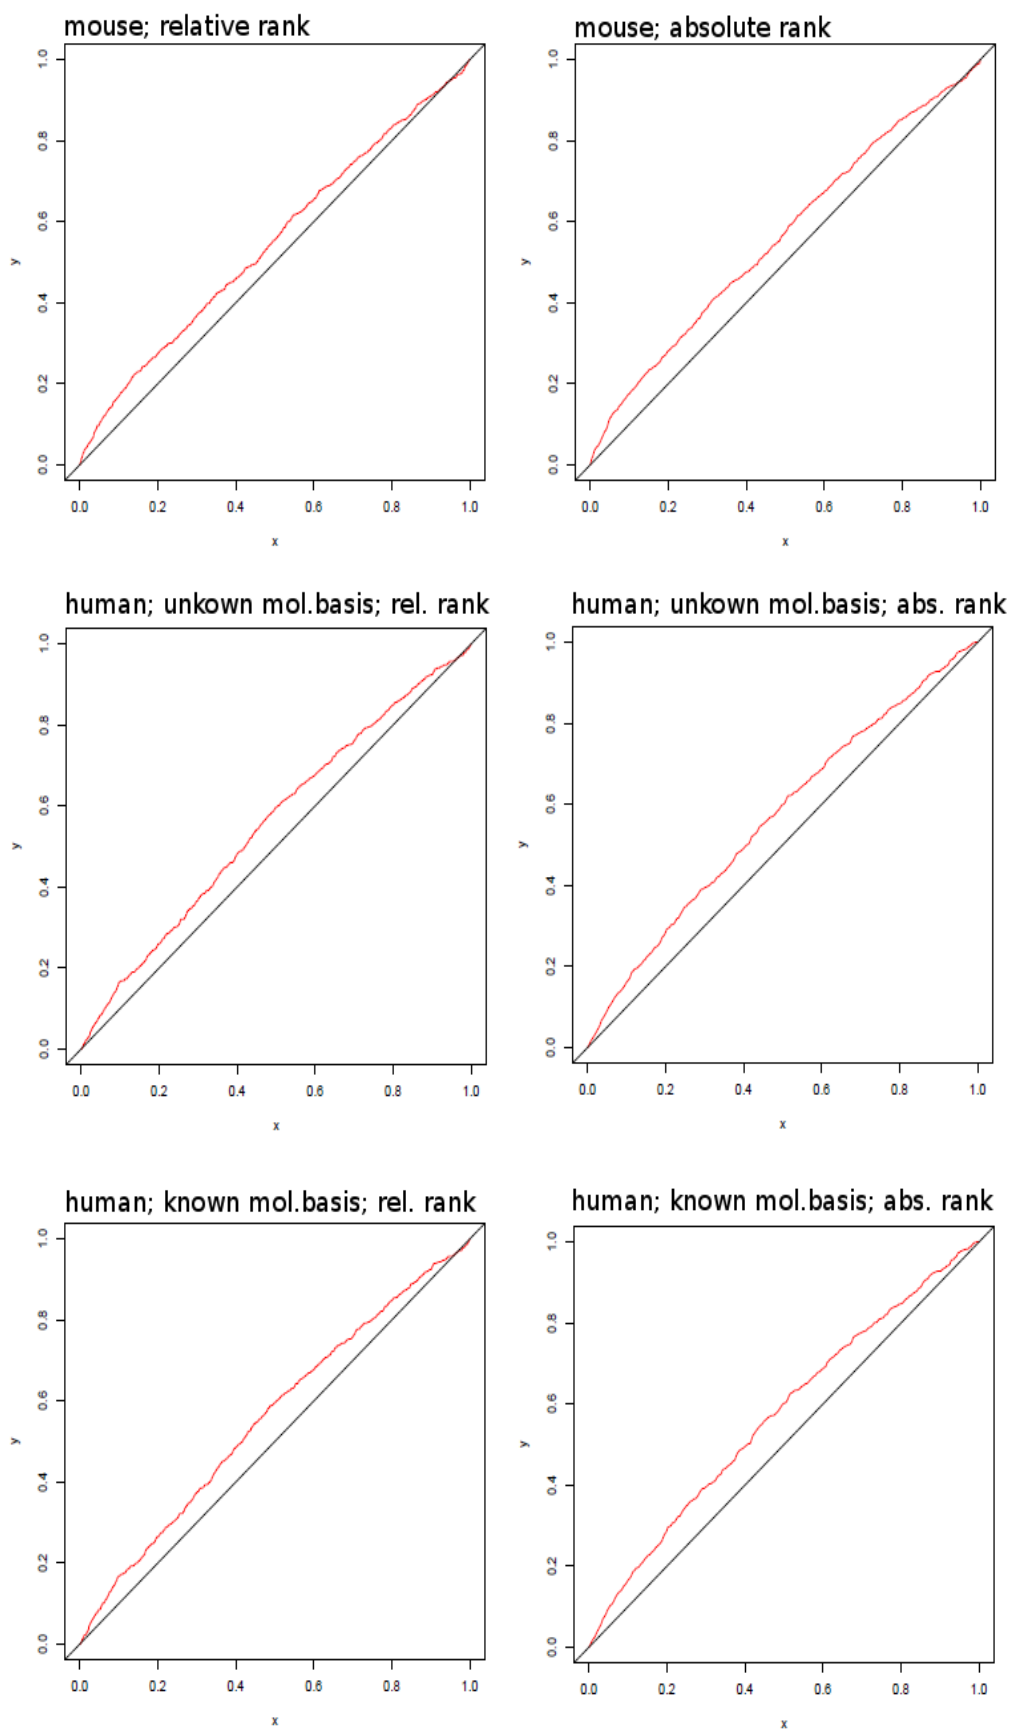

Supplement: supp_btq396_ECCB10-Paper91-Piro-SupplMaterial-rev1.pdf [file supp_btq396_ECCB10-Paper91-Piro-SupplMaterial-rev1.pdf]
